# Supplementary material for: Effects of calcination temperatures on the structure–activity relationship of Ni–La/Al2O3 catalysts for syngas methanation
Source: Royal Society of Chemistry journal article supplement (doi:10.1039/c9ra09674d), 2020-01-01
Supplement: c9ra09674d1.pdf [file c9ra09674d1.pdf]

## ***Supporting information file for***

### ***Effects of calcination temperature on structure-activity of Ni-La/Al<sub>2</sub>O<sub>3</sub> catalyst for syngas methanation***

Hongli Wu,<sup>a,b</sup> Meng Zou,<sup>a</sup> Lisheng Guo,<sup>b</sup> Fengyun Ma,<sup>\*a</sup> Wenlong Mo,<sup>a</sup> Yuming Yu,<sup>a</sup> Inamullah Mian<sup>a</sup> and Noritatsu Tsubaki<sup>\*b</sup>

<sup>a</sup> Key Laboratory of Coal Cleaning Conversion and Chemical Engineering Process Xinjiang Uyghur Autonomous Region, College of Chemistry and Chemical Engineering, Xinjiang University, Urumqi, Xinjiang 830046.

<sup>b</sup> Department of Applied Chemistry, School of Engineering, University of Toyama, Gofuku 3190, Toyama 930-8555, Japan.

Fengyun Ma: [ma\\_fy@126.com](mailto:ma_fy@126.com)

Noritatsu Tsubaki: [tsubaki@eng.u-toyama.ac.jp](mailto:tsubaki@eng.u-toyama.ac.jp)

**Fig. S1** Effect of calcination temperature on Ni grain size for reduced sample

**Fig. S2** Effects of calcination temperature on dispersion,  $S_{\text{BET}}$  and diameter of Ni.

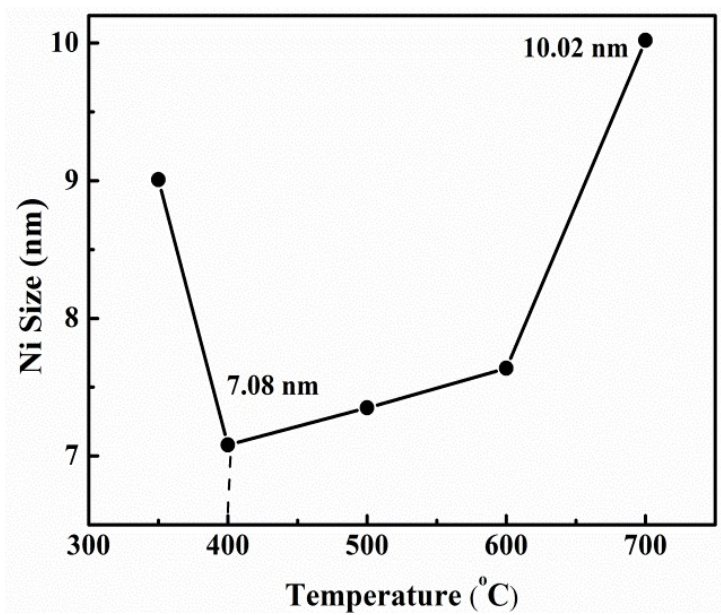

Fig. S1 Effect of calcination temperature on Ni grain size for reduced samples

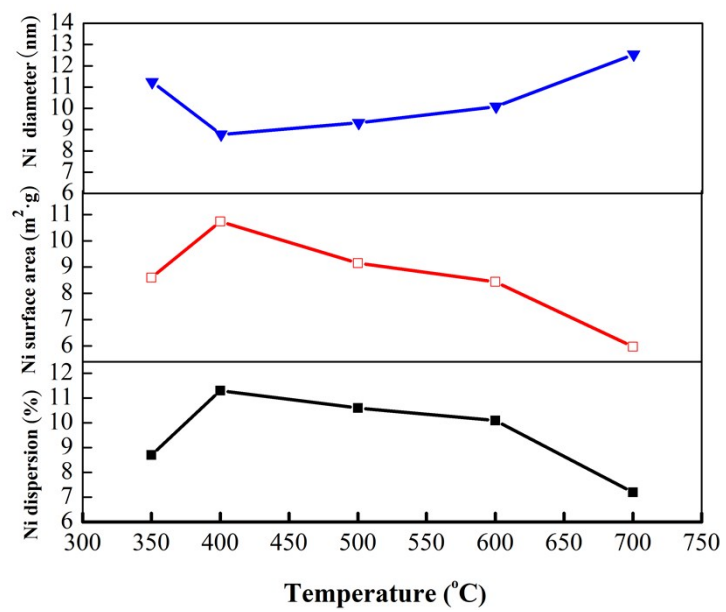

Fig. S2 Effects of calcination temperature on dispersion,  $S_{\text{BET}}$  and diameter of Ni.
